# Supplementary material for: Physiological effects of over-expressing compartment-specific components of the protein folding machinery in xylose-fermenting Saccharomyces cerevisiae
Source: PubMed Central journal article supplement (PMC4021093; doi:10.1186/1472-6750-14-28), 2014-04-23
Supplement: 1472-6750-14-28-S2.pdf [file 1472-6750-14-28-S2.pdf]

## ADDITIONAL FILE 2

### Physiological effects of over-expressing compartment-specific components of the protein folding machinery in xylose-fermenting *Saccharomyces cerevisiae*

Basti Bergdahl, Marie F. Gorwa-Grauslund and Ed W.J. van Niel

Division of Applied Microbiology, Department of Chemistry, Lund University, P.O. Box 124, SE-22100 Lund, Sweden

**Table S1. Carbon and degree of reduction balances for the glucose and xylose phases in defined and complex media. Values are given as mean  $\pm$  standard deviation of two independent experiments.**

|                            | Defined medium                  |                   |                                 |                   | Complex medium                  |                   |                                 |                   |
|----------------------------|---------------------------------|-------------------|---------------------------------|-------------------|---------------------------------|-------------------|---------------------------------|-------------------|
|                            | Glucose                         |                   | Xylose                          |                   | Glucose                         |                   | Xylose                          |                   |
|                            | Carbon balance (%) <sup>*</sup> | Redox balance (%) | Carbon balance (%) <sup>*</sup> | Redox balance (%) | Carbon balance (%) <sup>*</sup> | Redox balance (%) | Carbon balance (%) <sup>*</sup> | Redox balance (%) |
| <b>TMB3455 (control)</b>   | 107 $\pm$ 2                     | 112 $\pm$ 3       | 89 $\pm$ 3                      | 95 $\pm$ 3        | 129 $\pm$ 21                    | 158 $\pm$ 29      | 103 $\pm$ 8                     | 109 $\pm$ 8       |
| <b>TMB3456 (FRDI)</b>      | 119 $\pm$ 1                     | 127 $\pm$ 1       | 81 $\pm$ 4                      | 86 $\pm$ 4        | 145 $\pm$ 10                    | 162 $\pm$ 12      | 101 $\pm$ 3                     | 107 $\pm$ 3       |
| <b>TMB3457 (OSMI)</b>      | 111 $\pm$ 9                     | 118 $\pm$ 12      | 100 $\pm$ 9                     | 107 $\pm$ 9       | 134 $\pm$ 5                     | 149 $\pm$ 8       | 105 $\pm$ 3                     | 111 $\pm$ 3       |
| <b>TMB3458 (FRDI EROI)</b> | 114 $\pm$ 11                    | 122 $\pm$ 12      | 81 $\pm$ 5                      | 86 $\pm$ 6        | 147 $\pm$ 12                    | 167 $\pm$ 21      | 94 $\pm$ 10                     | 99 $\pm$ 10       |
| <b>TMB3459 (OSMI EROI)</b> | 114 $\pm$ 16                    | 119 $\pm$ 22      | 75 $\pm$ 2                      | 80 $\pm$ 3        | 138 $\pm$ 7                     | 150 $\pm$ 11      | 83 $\pm$ 3                      | 88 $\pm$ 3        |

\* The specific production rate of CO<sub>2</sub> was estimated according to the following equation:

$$r_{\text{CO}_2} \text{ (mmol/g CDW/h)} = r_{\text{etoh}} + r_{\text{ac}} + 0.1 \text{ mol CO}_2/\text{C-mol biomass} \times 1 \text{ C-mol biomass}/24.6 \text{ g CDW} \times \mu_{\text{max}}$$

**Table S2. Transcription data used for hierarchical cluster analysis. Values are given as the mean log<sub>2</sub> fold change ± pooled standard deviation of two independent measurements in each condition. P-values from a two-tailed student's t-test assuming equal variance are given within parenthesis.**

| Gene                             | Process                                                    | Anaerobic vs. aerobic |                   | Xylose vs. glucose |
|----------------------------------|------------------------------------------------------------|-----------------------|-------------------|--------------------|
|                                  |                                                            | Glucose               | Xylose            | Anaerobic          |
| <i>EPT1</i>                      | LIPID/INOSITOL METABOLISM<br>Phospholipid biosynthesis     | 0.66±0.05 (0.01)      | -0.43±0.09 (0.04) | -1.66±0.04 (0.00)  |
| <i>ALG7</i>                      | GLYCOSYLATION/MODIFICATION<br>Glycoprotein processing      | -0.03±0.12 (0.81)     | -1.36±0.20 (0.02) | -1.61±0.18 (0.01)  |
| <i>DFR1</i>                      | VITAMINS BIOSYNTHESIS<br>Folate biosynthesis               | -0.23±0.11 (0.18)     | -1.35±0.05 (0.00) | -1.30±0.04 (0.00)  |
| <i>SWP1</i>                      | GLYCOSYLATION/MODIFICATION<br>Oligosaccharyltransferase    | -0.07±0.16 (0.71)     | -1.24±0.21 (0.03) | -1.40±0.25 (0.03)  |
| <i>MPD1</i>                      | PROTEIN FOLDING<br>Disulfide bond formation                | 0.21±0.15 (0.29)      | -0.98±0.26 (0.07) | -1.34±0.28 (0.04)  |
| <i>SEC72</i>                     | TRANSLOCATION<br>Posttranslational translocation           | 0.16±0.16 (0.43)      | -0.81±0.21 (0.06) | -1.27±0.26 (0.04)  |
| <i>MCD4</i>                      | GLYCOSYLATION/MODIFICATION<br>GPI anchoring                | 0.22±0.16 (0.30)      | -0.73±0.16 (0.04) | -1.06±0.22 (0.04)  |
| <i>SFB2</i>                      | VESICLE TRAFFICKING/TRANSPORT<br>Budding (ER-Golgi)        | 0.21±0.23 (0.46)      | -0.68±0.12 (0.03) | -0.93±0.24 (0.06)  |
| <i>LHS1</i>                      | PROTEIN FOLDING<br>Chaperones                              | 0.12±0.12 (0.42)      | -0.70±0.15 (0.04) | -0.92±0.13 (0.02)  |
| <i>SEC12</i>                     | VESICLE TRAFFICKING/TRANSPORT<br>Budding (ER-Golgi)        | 0.12±0.09 (0.35)      | -0.56±0.01 (0.00) | -0.79±0.01 (0.00)  |
| <i>OST3</i>                      | GLYCOSYLATION/MODIFICATION<br>Oligosaccharyltransferase    | 0.03±0.06 (0.65)      | -0.51±0.03 (0.00) | -0.75±0.06 (0.01)  |
| <i>SEC59</i>                     | GLYCOSYLATION/MODIFICATION: Protein<br>N-glycosylation     | 0.07±0.09 (0.51)      | -0.54±0.01 (0.00) | -0.97±0.08 (0.01)  |
| <i>SEC71</i><br>( <i>SEC66</i> ) | TRANSLOCATION<br>Posttranslational translocation           | 0.06±0.14 (0.69)      | -0.58±0.15 (0.06) | -0.91±0.20 (0.04)  |
| <i>ERD2</i>                      | VESICLE TRAFFICKING/TRANSPORT<br>Retrieval (Golgi-ER)      | -0.01±0.06 (0.89)     | -0.67±0.04 (0.00) | -0.91±0.06 (0.00)  |
| <i>MPD2</i>                      | PROTEIN FOLDING<br>Disulfide bond formation                | 0.00±0.24 (0.99)      | -0.85±0.27 (0.09) | -0.79±0.33 (0.14)  |
| <i>SPC2</i>                      | TRANSLOCATION<br>Signal peptide processing                 | -0.09±0.12 (0.55)     | -0.76±0.22 (0.07) | -0.66±0.23 (0.10)  |
| <i>RAM2</i>                      | GLYCOSYLATION/MODIFICATION<br>Glycoprotein processing      | -0.17±0.19 (0.48)     | -0.75±0.11 (0.02) | -0.76±0.21 (0.07)  |
| <i>BFR1</i>                      | VESICLE TRAFFICKING/TRANSPORT<br>Distal secretion          | -0.08±0.07 (0.39)     | -0.63±0.14 (0.05) | -0.72±0.16 (0.04)  |
| <i>MNN11</i>                     | GLYCOSYLATION/MODIFICATION<br>Golgi/O-linked glycosylation | -0.05±0.06 (0.49)     | -0.63±0.10 (0.02) | -0.82±0.03 (0.00)  |
| <i>STE24</i>                     | GLYCOSYLATION/MODIFICATION<br>Glycoprotein processing      | 0.11±0.04 (0.13)      | -0.36±0.10 (0.08) | -0.82±0.11 (0.02)  |
| <i>GAA1</i>                      | GLYCOSYLATION/MODIFICATION<br>GPI anchoring                | 0.19±0.12 (0.24)      | -0.37±0.05 (0.02) | -0.72±0.11 (0.02)  |
| <i>SEC13</i>                     | VESICLE TRAFFICKING/TRANSPORT<br>Budding (ER-Golgi)        | 0.11±0.02 (0.04)      | -0.35±0.08 (0.05) | -0.61±0.07 (0.01)  |
| <i>WBP1</i>                      | GLYCOSYLATION/MODIFICATION<br>Oligosaccharyltransferase    | -0.03±0.12 (0.85)     | -0.51±0.11 (0.05) | -0.63±0.16 (0.06)  |
| <i>ECM31</i>                     | VITAMINS BIOSYNTHESIS<br>Pantothenate biosynthesis         | -0.05±0.11 (0.67)     | -0.52±0.12 (0.05) | -0.52±0.12 (0.05)  |
| <i>TRS120</i>                    | VESICLE TRAFFICKING/TRANSPORT<br>Fusion (ER-Golgi)         | -0.04±0.03 (0.36)     | -0.59±0.13 (0.05) | -0.20±0.13 (0.27)  |
| <i>ERV25</i>                     | VESICLE TRAFFICKING/TRANSPORT<br>Budding (ER-Golgi)        | -0.08±0.16 (0.66)     | -0.45±0.09 (0.04) | -0.43±0.17 (0.13)  |
| <i>VPS54</i>                     | VACUOLAR PROTEIN SORTING                                   | 0.02±0.15 (0.93)      | -0.40±0.05 (0.02) | -0.40±0.16 (0.12)  |
| <i>ACB1</i>                      | LIPID/INOSITOL METABOLISM<br>Fatty acid metabolism         | 0.09±0.12 (0.54)      | -0.42±0.14 (0.10) | -0.29±0.17 (0.24)  |

|              |                                                            |                   |                   |                   |
|--------------|------------------------------------------------------------|-------------------|-------------------|-------------------|
| <i>SCS3</i>  | LIPID/INOSITOL METABOLISM<br>Phospholipid biosynthesis     | 0.16±0.10 (0.24)  | -0.30±0.10 (0.10) | -0.40±0.10 (0.06) |
| <i>BOS1</i>  | VESICLE TRAFFICKING/TRANSPORT<br>Fusion (ER-Golgi)         | -0.08±0.13 (0.60) | -0.23±0.04 (0.03) | -0.26±0.13 (0.18) |
| <i>ERO1</i>  | PROTEIN FOLDING<br>Disulfide bond formation                | 0.02±0.06 (0.74)  | 0.00±0.04 (0.99)  | -0.50±0.04 (0.01) |
| <i>JEM1</i>  | PROTEIN FOLDING<br>Chaperones                              | 0.34±0.16 (0.16)  | 0.02±0.18 (0.93)  | -0.62±0.10 (0.03) |
| <i>YPT10</i> | VESICLE TRAFFICKING/TRANSPORT<br>Distal secretion          | 0.53±0.14 (0.07)  | 0.35±0.03 (0.01)  | -0.25±0.02 (0.00) |
| <i>KTR1</i>  | GLYCOSYLATION/MODIFICATION<br>Golgi/O-linked glycosylation | 0.53±0.06 (0.01)  | 0.58±0.02 (0.00)  | -0.22±0.04 (0.03) |
| <i>SFB3</i>  | VESICLE TRAFFICKING/TRANSPORT<br>Budding (ER-Golgi)        | 0.47±0.20 (0.15)  | 0.62±0.19 (0.08)  | 0.00±0.19 (0.99)  |
| <i>VPS35</i> | VACUOLAR PROTEIN SORTING                                   | 0.25±0.19 (0.32)  | 0.51±0.12 (0.05)  | 0.01±0.19 (0.98)  |
| <i>MNS1</i>  | GLYCOSYLATION/MODIFICATION<br>Glycoprotein processing      | 0.37±0.47 (0.51)  | 1.12±0.34 (0.08)  | -0.23±0.57 (0.73) |
| <i>PDI1</i>  | PROTEIN FOLDING<br>Disulfide bond formation                | 0.54±0.26 (0.17)  | 1.31±0.31 (0.05)  | -0.06±0.08 (0.55) |
| <i>TUS1</i>  | VESICLE TRAFFICKING/TRANSPORT<br>Distal secretion          | 0.19±0.05 (0.06)  | 0.46±0.07 (0.02)  | 0.42±0.07 (0.03)  |
| <i>PEX4</i>  | PROTEIN DEGRADATION<br>Ubiquitin/proteasome                | -0.04±0.09 (0.68) | 0.73±0.23 (0.08)  | 0.56±0.04 (0.00)  |
| <i>DOA4</i>  | PROTEIN DEGRADATION<br>Ubiquitin/proteasome                | 0.04±0.12 (0.80)  | 0.55±0.08 (0.02)  | 0.82±0.14 (0.03)  |
| <i>RIB1</i>  | VITAMINS BIOSYNTHESIS<br>Flavin biosynthesis               | 0.15±0.20 (0.53)  | 1.07±0.32 (0.08)  | 1.38±0.25 (0.03)  |
| <i>ECM8</i>  | CELL WALL BIOGENESIS                                       | -0.34±0.12 (0.11) | 1.69±0.44 (0.06)  | 1.65±0.44 (0.06)  |
| <i>YET2</i>  | VESICLE TRAFFICKING/TRANSPORT<br>Budding (ER-Golgi)        | -0.11±0.36 (0.79) | 2.14±0.27 (0.02)  | 2.68±0.41 (0.02)  |
| <i>ECM3</i>  | CELL WALL BIOGENESIS                                       | 0.81±0.01 (0.00)  | 2.95±0.08 (0.00)  | 0.83±0.06 (0.00)  |
| <i>HEM13</i> | PORPHYRIN COMPOUNDS BIOSYNTHESIS<br>Heme biosynthesis      | 3.18±0.13 (0.00)  | 2.46±0.11 (0.00)  | -0.14±0.10 (0.32) |
| <i>ARE1</i>  | LIPID/INOSITOL METABOLISM<br>Sterol metabolism             | 2.21±0.38 (0.03)  | 2.80±0.25 (0.01)  | -0.64±0.40 (0.25) |
| <i>CSR1</i>  | CELL WALL BIOGENESIS                                       | 2.12±0.45 (0.04)  | 2.58±0.35 (0.02)  | -0.84±0.52 (0.25) |
| <i>PMT5</i>  | GLYCOSYLATION/MODIFICATION<br>Golgi/O-linked glycosylation | 1.89±0.30 (0.02)  | 2.05±0.15 (0.01)  | -0.30±0.31 (0.45) |
| <i>PMT3</i>  | GLYCOSYLATION/MODIFICATION<br>Golgi/O-linked glycosylation | 1.75±0.38 (0.04)  | 1.96±0.25 (0.02)  | -0.24±0.43 (0.63) |
| <i>HAP1</i>  | TRANSCRIPTION FACTOR                                       | 1.65±0.41 (0.06)  | 2.09±0.30 (0.02)  | 0.38±0.50 (0.52)  |
| <i>MGA2</i>  | LIPID/INOSITOL METABOLISM<br>Fatty acid metabolism         | 1.84±0.11 (0.00)  | 1.13±0.07 (0.00)  | 0.26±0.11 (0.14)  |
| <i>HMG2</i>  | LIPID/INOSITOL METABOLISM<br>Sterol metabolism             | 1.60±0.11 (0.00)  | 1.23±0.21 (0.03)  | -0.57±0.06 (0.01) |
| <i>EUG1</i>  | PROTEIN FOLDING<br>Disulfide bond formation                | 1.65±0.11 (0.00)  | 1.31±0.26 (0.04)  | -1.47±0.28 (0.03) |

**Table S3. Maximum specific growth rates and product yields in anaerobic batch fermentation of 20 g/L glucose and 50 g/L xylose in defined medium (2X YNB) using strains TMB3455, TMB3456 and TMB3458. Values are given as mean  $\pm$  standard deviation of two independent experiments.**

|                                             | Glucose phase        |                   |                        | Xylose phase         |                   |                        |
|---------------------------------------------|----------------------|-------------------|------------------------|----------------------|-------------------|------------------------|
|                                             | TMB3455<br>(control) | TMB3456<br>(FRDI) | TMB3458<br>(FRDI EROI) | TMB3455<br>(control) | TMB3456<br>(FRDI) | TMB3458<br>(FRDI EROI) |
| $\mu_{max}$ (1/h)                           | 0.29 $\pm$ 0.012     | 0.33 $\pm$ 0.028  | 0.30 $\pm$ 0.029       | 0.029 $\pm$ 0.002    | 0.023 $\pm$ 0.006 | 0.029 $\pm$ 0.005      |
| <b>Yields per substrate (mol/mol sugar)</b> |                      |                   |                        |                      |                   |                        |
| $Y_{xytl/s}$                                | –                    | –                 | –                      | 0.24 $\pm$ 0.03      | 0.20 $\pm$ 0.01   | 0.22 $\pm$ 0.03        |
| $Y_{glyc/s}$                                | 0.22 $\pm$ 0.02      | 0.24 $\pm$ 0.02   | 0.23 $\pm$ 0.02        | 0.020 $\pm$ 0.000    | 0.021 $\pm$ 0.002 | 0.017 $\pm$ 0.002      |
| $Y_{ac/s}$                                  | 0.020 $\pm$ 0.001    | 0.020 $\pm$ 0.004 | 0.019 $\pm$ 0.005      | 0.019 $\pm$ 0.001    | 0.018 $\pm$ 0.005 | 0.023 $\pm$ 0.002      |
| $Y_{etoh/s}$                                | 1.87 $\pm$ 0.14      | 2.08 $\pm$ 0.06   | 2.00 $\pm$ 0.20        | 1.03 $\pm$ 0.00      | 0.97 $\pm$ 0.03   | 0.93 $\pm$ 0.04        |
| $Y_{succ/s}$                                | 0.003 $\pm$ 0.000    | 0.002 $\pm$ 0.001 | 0.003 $\pm$ 0.001      | 0.009 $\pm$ 0.000    | 0.010 $\pm$ 0.002 | 0.007 $\pm$ 0.002      |
| $Y_{x/s}$ (g/mol)                           | 10.4 $\pm$ 0.5       | 11.7 $\pm$ 0.7    | 10.7 $\pm$ 1.1         | 3.8 $\pm$ 0.4        | 2.9 $\pm$ 1.1     | 3.8 $\pm$ 0.2          |
| <b>Yields per biomass (mmol/g CDW)</b>      |                      |                   |                        |                      |                   |                        |
| $Y_{xytl/x}$                                | –                    | –                 | –                      | 63.1 $\pm$ 0.3       | 73.1 $\pm$ 22.4   | 57.9 $\pm$ 9.8         |
| $Y_{glyc/x}$                                | 20.2 $\pm$ 0.8       | 18.9 $\pm$ 0.3    | 18.9 $\pm$ 1.6         | 5.2 $\pm$ 0.6        | 7.6 $\pm$ 1.8     | 4.4 $\pm$ 0.2          |
| $Y_{ac/x}$                                  | 2.1 $\pm$ 0.1        | 1.8 $\pm$ 0.1     | 1.9 $\pm$ 0.4          | 5.1 $\pm$ 0.3        | 6.3 $\pm$ 0.6     | 6.0 $\pm$ 0.8          |
| $Y_{etoh/x}$                                | 153 $\pm$ 8          | 140 $\pm$ 4       | 151 $\pm$ 1            | 271 $\pm$ 30         | 356 $\pm$ 124     | 243 $\pm$ 24           |
| $Y_{succ/x}$                                | 0.19 $\pm$ 0.04      | 0.15 $\pm$ 0.01   | 0.26 $\pm$ 0.06        | 2.5 $\pm$ 0.4        | 3.7 $\pm$ 0.9     | 1.3 $\pm$ 0.5          |

**Table S4. Maximum specific growth rates and product yields in anaerobic batch fermentation of 20 g/L glucose and 50 g/L xylose in complex medium (10 g/L yeast extract) using strains TMB3455, TMB3456 and TMB3458. Values are given as mean  $\pm$  standard deviation of two independent experiments.**

|                                             | Glucose phase        |                   |                        | Xylose phase         |                   |                        |
|---------------------------------------------|----------------------|-------------------|------------------------|----------------------|-------------------|------------------------|
|                                             | TMB3455<br>(control) | TMB3456<br>(FRDI) | TMB3458<br>(FRDI EROI) | TMB3455<br>(control) | TMB3456<br>(FRDI) | TMB3458<br>(FRDI EROI) |
| $\mu_{max}$ (1/h)                           | 0.37 $\pm$ 0.003     | 0.37 $\pm$ 0.000  | 0.38 $\pm$ 0.004       | 0.033 $\pm$ 0.004    | 0.030 $\pm$ 0.006 | 0.035 $\pm$ 0.008      |
| <b>Yields per substrate (mol/mol sugar)</b> |                      |                   |                        |                      |                   |                        |
| $Y_{xytl/s}$                                | –                    | –                 | –                      | 0.14 $\pm$ 0.01      | 0.16 $\pm$ 0.01   | 0.14 $\pm$ 0.02        |
| $Y_{glyc/s}$                                | 0.13 $\pm$ 0.01      | 0.10 $\pm$ 0.00   | 0.11 $\pm$ 0.00        | 0.013 $\pm$ 0.001    | 0.014 $\pm$ 0.003 | 0.011 $\pm$ 0.003      |
| $Y_{ac/s}$                                  | 0.030 $\pm$ 0.006    | 0.019 $\pm$ 0.000 | 0.022 $\pm$ 0.001      | 0.022 $\pm$ 0.003    | 0.023 $\pm$ 0.001 | 0.024 $\pm$ 0.002      |
| $Y_{etoh/s}$                                | 2.7 $\pm$ 0.6        | 2.8 $\pm$ 0.3     | 2.9 $\pm$ 0.5          | 1.4 $\pm$ 0.1        | 1.4 $\pm$ 0.1     | 1.3 $\pm$ 0.1          |
| $Y_{succ/s}$                                | 0.005 $\pm$ 0.004    | 0.002 $\pm$ 0.000 | 0.003 $\pm$ 0.001      | 0.003 $\pm$ 0.001    | 0.004 $\pm$ 0.000 | 0.004 $\pm$ 0.000      |
| $Y_{x/s}$ (g/mol)                           | 17.5 $\pm$ 1.4       | 19.3 $\pm$ 0.5    | 18.3 $\pm$ 2.2         | 6.4 $\pm$ 0.8        | 6.0 $\pm$ 0.2     | 6.7 $\pm$ 0.3          |
| <b>Yields per biomass (mmol/g CDW)</b>      |                      |                   |                        |                      |                   |                        |
| $Y_{xytl/x}$                                | –                    | –                 | –                      | 22.3 $\pm$ 0.8       | 26.4 $\pm$ 2.3    | 20.6 $\pm$ 2.3         |
| $Y_{glyc/x}$                                | 7.3 $\pm$ 0.5        | 6.9 $\pm$ 0.6     | 6.8 $\pm$ 0.3          | 2.1 $\pm$ 0.0        | 2.4 $\pm$ 0.6     | 1.7 $\pm$ 0.3          |
| $Y_{ac/x}$                                  | 1.3 $\pm$ 0.4        | 1.4 $\pm$ 0.2     | 1.3 $\pm$ 0.0          | 3.4 $\pm$ 0.0        | 3.9 $\pm$ 0.1     | 3.5 $\pm$ 0.2          |
| $Y_{etoh/x}$                                | 94.2 $\pm$ 5.0       | 92.0 $\pm$ 6.9    | 93.2 $\pm$ 6.0         | 222 $\pm$ 11         | 230 $\pm$ 6       | 189 $\pm$ 9            |
| $Y_{succ/x}$                                | 0.12 $\pm$ 0.07      | 0.20 $\pm$ 0.09   | 0.15 $\pm$ 0.000       | 0.54 $\pm$ 0.03      | 0.62 $\pm$ 0.03   | 0.55 $\pm$ 0.03        |

**Table S5. Transcription data from Runquist *et al.* (Microb Cell Fact 2009, 8) that is referred to in the main text. Values are given as the mean log<sub>2</sub> fold change ± pooled standard deviation of two independent measurements in each condition. *P*-values from a two-tailed student's t-test assuming equal variance are given within parenthesis.**

| Gene        | Description                                                                                                                                                    | Anaerobic vs. aerobic |                      | Xylose vs. glucose   |                      |
|-------------|----------------------------------------------------------------------------------------------------------------------------------------------------------------|-----------------------|----------------------|----------------------|----------------------|
|             |                                                                                                                                                                | Glucose               | Xylose               | Anaerobic            | Aerobic              |
| <i>KAR2</i> | ATPase acting as a chaperone to mediate protein folding in the ER; regulates the unfolded protein response via interaction with Ire1p                          | 0.53±0.21<br>(0.13)   | 0.60±0.25<br>(0.14)  | -0.45±0.20<br>(0.16) | -0.51±0.26<br>(0.19) |
| <i>INO1</i> | Inositol 1-phosphate synthase, involved in synthesis of inositol phosphates and inositol-containing phospholipids                                              | 1.68±0.44<br>(0.06)   | -0.20±0.75<br>(0.81) | 2.74±0.85<br>(0.08)  | 4.62±0.15<br>(0.00)  |
| <i>ERO1</i> | Thiol oxidase required for oxidative protein folding in the endoplasmic reticulum                                                                              | 0.02±0.06<br>(0.74)   | 0.00±0.04<br>(0.99)  | -0.50±0.04<br>(0.01) | -0.47±0.06<br>(0.02) |
| <i>MDH2</i> | Cytoplasmic malate dehydrogenase                                                                                                                               | -0.39±0.22<br>(0.22)  | 0.80±0.17<br>(0.04)  | 1.90±0.20<br>(0.01)  | 0.71±0.20<br>(0.07)  |
| <i>GUT2</i> | Mitochondrial glycerol-3-phosphate dehydrogenase                                                                                                               | -0.61±0.06<br>(0.01)  | -0.04±0.51<br>(0.94) | 2.92±0.51<br>(0.03)  | 2.35±0.07<br>(0.00)  |
| <i>ACH1</i> | Coenzyme A transferase, primarily localized to mitochondria                                                                                                    | 0.43±0.45<br>(0.44)   | 0.27±0.53<br>(0.67)  | 2.24±0.67<br>(0.08)  | 2.40±0.17<br>(0.00)  |
| <i>MSN4</i> | Transcriptional activator related to Msn2p; activated in stress conditions, which results in translocation from the cytoplasm to the nucleus                   | 0.12±0.21<br>(0.62)   | 1.25±0.17<br>(0.02)  | 2.05±0.24<br>(0.01)  | 0.93±0.13<br>(0.02)  |
| <i>YAP1</i> | Basic leucine zipper (bZIP) transcription factor required for oxidative stress tolerance                                                                       | 0.01±0.12<br>(0.92)   | 0.46±0.08<br>(0.03)  | 0.70±0.12<br>(0.03)  | 0.25±0.08<br>(0.09)  |
| <i>PDII</i> | Protein disulfide isomerase, multifunctional protein resident in the ER, essential for the formation of disulfide bonds in secretory and cell-surface proteins | 0.54±0.26<br>(0.17)   | 1.31±0.31<br>(0.05)  | -0.06±0.08<br>(0.55) | -0.83±0.39<br>(0.17) |
